# Supplementary material for: Chromosome-Length Assembly of the Baikal Seal (Pusa sibirica) Genome Reveals a Historically Large Population Prior to Isolation in Lake Baikal
Source: MDPI journal article supplement (doi:10.3390/genes14030619), 2023-02-28
Supplement: s1 [file s1]

Table S1: Description of baikal seal libraries;

Table S2. Read counts of *Pusa sibirica* and additional pinniped samples before and after trimming;

Table S3. Genome completeness metrics based on orthologs analysis with BUSCO ver.5 using carnivora database (carnivora\_odb10);

Table S4. Major types of transposable elements detected in the genome of baikal seal;

Table S5. Chromosome assignments;

Table S6. Statistical metrics of heterozygosity for analyzed samples of three pinniped species excluding X chromosome. SNPs are counted in 1 Mbp sliding windows with 100kbp step, and scaled to SNPs per kbp;

Table S7. Table with calibrations used for dating in phylogeny analysis;

Table S8. Dating of divergence times based on dated maximum likelihood phylogenetic tree of 5 seals (*Erignathus barbatus*, *Phoca vitulina*, *Phoca largha*, *Halichoerus grypus*, *Pusa sibirica*) and 6 other carnivore species (*Acinonyx jubatus*, *Puma concolor*, *Canis lupus familiaris*, *Ursus arctos*, *Ailurus fulgens*, *Odobenus rosmarus*) using 5 fossil calibrations;

Figure S1. K-mer distribution of 23-mers for *Pusa sibirica*, *Halichoerus grypus*, and *Phoca largha* read after standart adapters trimming (A), and after further cut length, and downsampling (B). PUSI\_M - *Pusa sibirica* male sample; PUSI\_F - *Pusa sibirica* female sample; HAGR\_M - *Halichoerus grypus* DNAZoo sample; PHLA\_F\_DZ - *Phoca largha* DNAZoo sample; PHLA\_F\_SU - *Phoca largha* Seoul University sample;

Figure S2. Coverage plots for (A) *Pusa sibirica*, female, DNAZoo, (B) *Pusa sibirica*, male, DNAZoo, (C) *Halichoerus grypus*, male, DNAZoo, (D) *Phoca largha*, female, DNAZoo, and (E) *Phoca largha*, female, Seoul University. Coverage was calculated in non-overlapping sliding windows of 1 Mbp and divided by whole genome median coverage;

Figure S3. Genome-wide heterozygosity distribution for 2 samples of baikal seal (*Pusa sibirica*), 1 sample of grey seal (*Halichoerus grypus*) and 2 samples of spotted seal (*Phoca largha*). SNPs are counted in 1 Mbp non-overlapping sliding windows and scaled to heterozygous SNPs per kbp;

Figure S4. Demographic history reconstruction for all available samples of *Pusa sibirica*, *Halichoerus grypus*, and *Phoca largha* with mutation rate  $2.5 \cdot 10^{-8}$  excluding X chromosome;

Figure S5. The phylogenetic tree for eleven carnivores including five seal species (*Halichoerus grypus*, *Pusa sibirica*, *Phoca largha*, *Phoca vitulina* and *Erignathus barbatus*). Node labels show posterior probabilities. Branch lengths are in proportion to expected changes per site.

**Table S1.** Description of baikal seal libraries.

| Library ID | SRA ID      | Library type | Sequencer   | Insert size (target), | Insert size (actual), | Read length, | Reads, million |          |
|------------|-------------|--------------|-------------|-----------------------|-----------------------|--------------|----------------|----------|
|            |             |              |             | bp                    | bp                    |              | raw            | filtered |
| male       | SRR22409084 | PE           | HiSeq2500   | 350                   | 300                   | 100          | 2386.3         | 2341.8   |
| mp3kb      | SRR22409081 | MP           | HiSeq2500   | 3000                  | 2800                  | 100          | 593.4          | 210.1    |
| gelfree    | SRR22409083 | MP           | HiSeq2500   | 3000                  | 3200                  | 100          | 33.8           | 13.3     |
| MP3-4      | SRR22409082 | MP           | HiSeq2500   | 3000-4000             | 3200                  | 100          | 34.8           | 14.5     |
| MP5-7      | SRR22409080 | MP           | HiSeq2500   | 5000-7000             | 5100                  | 100          | 31.2           | 13.3     |
| MP8-10     | SRR22409079 | MP           | HiSeq2500   | 8000-10000            | 8400                  | 100          | 41.9           | 17.6     |
| HiC        |             | HiC          | NovaSeq6000 | NA                    | NA                    | 150          | 1348.5         | 1013.9   |

**Table S2.** Read counts of *Pusa sibirica* and additional pinniped samples before and after trimming.

| Species                                                                | Raw read pairs,<br>mln | Trimmed,<br>mln | Downsampled,<br>mln | Saved reads,<br>% |
|------------------------------------------------------------------------|------------------------|-----------------|---------------------|-------------------|
| <i>Pusa sibirica</i> (male, DNAZoo);<br>SRR22409084                    | 1 193.1                | 1129.2          | 338.9               | 28.4              |
| <i>Pusa sibirica</i> (female, DNAZoo);<br>SRR22409450                  | 357.4                  | 340.6           | 340.6               | 95.3              |
| <i>Halichoerus grypus</i> (male,<br>DNAZoo); SRR16086823               | 458.3                  | 434.1           | 338.6               | 73.4              |
| <i>Phoca largha</i> (female, DNAZoo);<br>SRR13167966                   | 355.4                  | 337.8           | 337.8               | 95                |
| <i>Phoca largha</i> (female, Seoul<br>National University); SRR6433059 | 504.5                  | 452.4           | 361.9               | 71.7              |

**Table S3.** Genome completeness metrics based on orthologs analysis with BUSCO ver.5 using carnivora database (carnivora\_odb10).

| Species                    | Complete single-copy | Complete duplicated | Fragmented | Missing     |
|----------------------------|----------------------|---------------------|------------|-------------|
| <i>Erignathus barbatus</i> | 12931 (89.2%)        | 293 (2.0%)          | 274 (1.9%) | 1004 (6.9%) |
| <i>Halichoerus grypus</i>  | 12955 (89.3%)        | 302 (2.1%)          | 270 (1.9%) | 975 (6.7%)  |
| <i>Odobenus rosmarus</i>   | 13353 (92.1%)        | 473 (3.3%)          | 126 (0.9%) | 550 (3.7%)  |
| <i>Phoca largha</i>        | 13053 (90.0%)        | 291 (2.0%)          | 235 (1.6%) | 923 (6.4%)  |
| <i>Phoca vitulina</i>      | 13412 (92.5%)        | 352 (2.4%)          | 142 (1.0%) | 596 (4.1%)  |
| <i>Pusa sibirica</i>       | 12755 (88.0%)        | 225 (1.6%)          | 406 (2.8%) | 1116 (7.6%) |

**Table S4.** Major types of transposable elements detected in the genome of baikal seal.

| Type of element | <i>Halichoerus grypus</i> |     | <i>Phoca largha</i> |     | <i>Pusa sibirica</i> |     | <i>Phoca vitulina</i> |     |
|-----------------|---------------------------|-----|---------------------|-----|----------------------|-----|-----------------------|-----|
|                 | %                         | Mbp | %                   | Mbp | %                    | Mbp | %                     | Mbp |
| SINEs           | 3.14                      | 76  | 3.15                | 74  | 3.16                 | 75  | 3.16                  | 75  |
| LINEs           | 19.25                     | 465 | 18.5                | 434 | 19.18                | 453 | 20.67                 | 489 |
| LTR elements    | 4.92                      | 119 | 4.85                | 114 | 4.92                 | 116 | 4.84                  | 114 |
| DNA elements    | 3.15                      | 76  | 3.12                | 73  | 3.16                 | 75  | 3.12                  | 74  |
| Unclassified    | 0.03                      | 0.6 | 0.03                | 0.6 | 0.03                 | 0.6 | 0.03                  | 0.6 |
| Total           | 30.49                     | 736 | 29.64               | 696 | 30.46                | 719 | 31.81                 | 752 |

**Table S5.** Chromosome assignments.

| <i>Pusa sibirica</i>  |                  | <i>Halichoerus grypus</i> |       | <i>Phoca largha</i> |       | <i>Phoca vitulina</i> |       |
|-----------------------|------------------|---------------------------|-------|---------------------|-------|-----------------------|-------|
| Scaffold <sup>1</sup> | Chr <sup>2</sup> | Scaffold                  | Chr   | Scaffold            | Chr   | Scaffold              | Chr   |
| HiC_scaffold_2        | Chr1             | HiC_scaffold_2            | Aut2  | HiC_scaffold_2      | Aut2  | HiC_scaffold_2        | Chr1  |
| HiC_scaffold_1        | Chr2             | HiC_scaffold_1            | Aut1  | HiC_scaffold_1      | Aut1  | HiC_scaffold_4        | Chr2  |
| HiC_scaffold_3        | Chr3             | HiC_scaffold_3            | Aut3  | HiC_scaffold_3      | Aut3  | HiC_scaffold_16       | Chr3  |
| HiC_scaffold_4        | Chr4             | HiC_scaffold_4            | Aut4  | HiC_scaffold_4      | Aut4  | HiC_scaffold_1        | Chr4  |
| HiC_scaffold_5        | Chr5             | HiC_scaffold_5            | Aut5  | HiC_scaffold_5      | Aut5  | HiC_scaffold_3        | Chr5  |
| HiC_scaffold_6        | Chr6             | HiC_scaffold_6            | Aut6  | HiC_scaffold_6      | Aut6  | HiC_scaffold_12       | Chr6  |
| HiC_scaffold_7        | Chr7             | HiC_scaffold_7            | Aut7  | HiC_scaffold_7      | Aut7  | HiC_scaffold_13       | Chr7  |
| HiC_scaffold_8        | Chr8             | HiC_scaffold_8            | Aut8  | HiC_scaffold_8      | Aut8  | HiC_scaffold_14       | Chr8  |
| HiC_scaffold_9        | Chr9             | HiC_scaffold_9            | Aut9  | HiC_scaffold_9      | Aut9  | HiC_scaffold_11       | Chr9  |
| HiC_scaffold_10       | Chr10            | HiC_scaffold_10           | Aut10 | HiC_scaffold_10     | Aut10 | HiC_scaffold_6        | Chr10 |
| HiC_scaffold_11       | Chr11            | HiC_scaffold_11           | Aut11 | HiC_scaffold_11     | Aut11 | HiC_scaffold_10       | Chr11 |
| HiC_scaffold_12       | Chr12            | HiC_scaffold_12           | Aut12 | HiC_scaffold_12     | Aut12 | HiC_scaffold_5        | Chr12 |
| HiC_scaffold_14       | Chr13            | HiC_scaffold_14           | Aut14 | HiC_scaffold_14     | Aut14 | HiC_scaffold_9        | Chr13 |
| HiC_scaffold_13       | Chr14            | HiC_scaffold_13           | Aut13 | HiC_scaffold_13     | Aut13 | HiC_scaffold_7        | Chr14 |
| HiC_scaffold_15       | Chr15            | HiC_scaffold_15           | Aut15 | HiC_scaffold_15     | Aut15 | HiC_scaffold_8        | Chr15 |
| HiC_scaffold_16       | ChrX             | HiC_scaffold_16           | ChrX  | HiC_scaffold_16     | ChrX  | HiC_scaffold_15       | ChrX  |

<sup>1</sup> Scaffold name according to assembly;

<sup>2</sup> Chromosome name mapped with scaffold according to fluorescent *in situ* hybridization (FISH).

**Table S6.** Statistical metrics of heterozygosity for analyzed samples of three pinniped species excluding X chromosome. SNPs are counted in 1 Mbp sliding windows with 100kbp step, and scaled to SNPs per kbp.

| Species                                         | min | median | mean | mode              | max  |
|-------------------------------------------------|-----|--------|------|-------------------|------|
| <i>Halichoerus grypus</i> , male                | 0   | 0.5    | 0.51 | 0.48 <sup>1</sup> | 1.72 |
| <i>Phoca largha</i> , female (DNAZoo)           | 0   | 0.68   | 0.7  | 0.67              | 3.23 |
| <i>Phoca largha</i> , female (Seoul university) | 0   | 0.63   | 0.64 | 0.61              | 2    |
| <i>Pusa sibirica</i> , male                     | 0   | 0.62   | 0.66 | 0.56*             | 2    |
| <i>Pusa sibirica</i> , female                   | 0   | 0.67   | 0.7  | 0.56              | 2.34 |

<sup>1</sup> for male samples we observed additional mode at 0. It corresponds to hemizigous region (part of X chromosome outside of PAR) in males.

**Table S7.** Table with calibrations used for dating in phylogeny analysis.

| MRCA <sup>1</sup>                              | Fossil calibrations |                | Source                                                       |
|------------------------------------------------|---------------------|----------------|--------------------------------------------------------------|
|                                                | Lower boundary      | Upper boundary |                                                              |
| <i>Feliformia</i> - <i>Caniformia</i>          | 37.3                | 66             | Benton et al. 2015; Fossil Calibration Database <sup>2</sup> |
| <i>Musteloidea</i> - <i>Pinnipedia</i>         | 33.8                | 48.8           | Meredith et al. 2011                                         |
| <i>Phocidae</i> - <i>Otarioidea</i>            | 20.4                | 34             | Meredith et al. 2011                                         |
| <i>Erignathus</i> - <i>Pusa</i> + <i>Phoca</i> | -                   | 23             | Hassanin et al, 2021                                         |
| <i>Phoca</i> - <i>Pusa</i>                     | 0.79                | -              | Fulton and Stobcock, 2010; Demere et al., 2003               |

<sup>1</sup> Most recent common ancestor.

<sup>2</sup>

[fossilcalibrations.org](http://fossilcalibrations.org)



**Table S8.** Dating of divergence times based on dated maximum likelihood phylogenetic tree of 5 seals (*Erignathus barbatus*, *Phoca vitulina*, *Phoca largha*, *Halichoerus grypus*, *Pusa sibirica*) and 6 other carnivore species (*Acinonyx jubatus*, *Puma concolor*, *Canis lupus familiaris*, *Ursus arctos*, *Ailurus fulgens*, *Odobenus rosmarus*) using 5 fossil calibrations.

| MRCA <sup>1</sup>                            | Independent clock, million years |                        |                        | Correlated clock, million years |           |           | Global clock, million years |           |           |
|----------------------------------------------|----------------------------------|------------------------|------------------------|---------------------------------|-----------|-----------|-----------------------------|-----------|-----------|
|                                              | Node age                         | 95% CI LB <sup>2</sup> | 95% CI UB <sup>3</sup> | Node age                        | 95% CI LB | 95% CI UB | Node age                    | 95% CI LB | 95% CI UB |
| <b><i>Feliformia - Caniformia</i></b>        | 62.8                             | 54                     | 67.6                   | 59.6                            | 48.6      | 66.5      | 66.8                        | 63        | 72        |
| <i>Canidae - Ursidae</i>                     | 57.6                             | 47.4                   | 65.4                   | 56.9                            | 46.6      | 64.5      | 57.7                        | 54.4      | 62.2      |
| <i>Ursidae - Ailuridae</i>                   | 44.7                             | 36.9                   | 51.6                   | 45.9                            | 38        | 51.6      | 42.2                        | 39.7      | 45.4      |
| <b><i>Musteloidea - Pinnipedia</i></b>       | 41.4                             | 34.2                   | 47.9                   | 43.3                            | 35.9      | 48.7      | 39.6                        | 37.4      | 42.7      |
| <b><i>Phocidae - Odobenidae</i></b>          | 21.5                             | 19.5                   | 25.5                   | 24.3                            | 20.3      | 30.2      | 16.2                        | 15.3      | 17.5      |
| <u><i>Erignathus - Pusa+Phoca</i></u>        | 7.1                              | 4.8                    | 9.6                    | 11.2                            | 8.3       | 15.4      | 6.3                         | 5.9       | 6.8       |
| <u><i>Phoca - Pusa+Halicoerus grypus</i></u> | 2                                | 1.4                    | 2.6                    | 3.4                             | 2.4       | 5.1       | 1.8                         | 1.7       | 2         |
| <i>Pusa sibirica - Halicoerus grypus</i>     | 1.6                              | 1.1                    | 2.2                    | 2.9                             | 2         | 4.3       | 1.6                         | 1.5       | 1.7       |
| <i>Phoca largha - Phoca vitulina</i>         | 0.7                              | 0.4                    | 1                      | 1.3                             | 0.9       | 2         | 0.6                         | 0.6       | 0.7       |

<sup>1</sup> Most recent common ancestor

<sup>2</sup> Lower boundary of 95 % confidence interval for Node age

<sup>3</sup> Upper boundary of 95 % confidence interval for Node age

For nodes in **bold** both lower and upper boundaries based on fossil evidence was set, for nodes in underlined - only one, lower or upper, respectively.

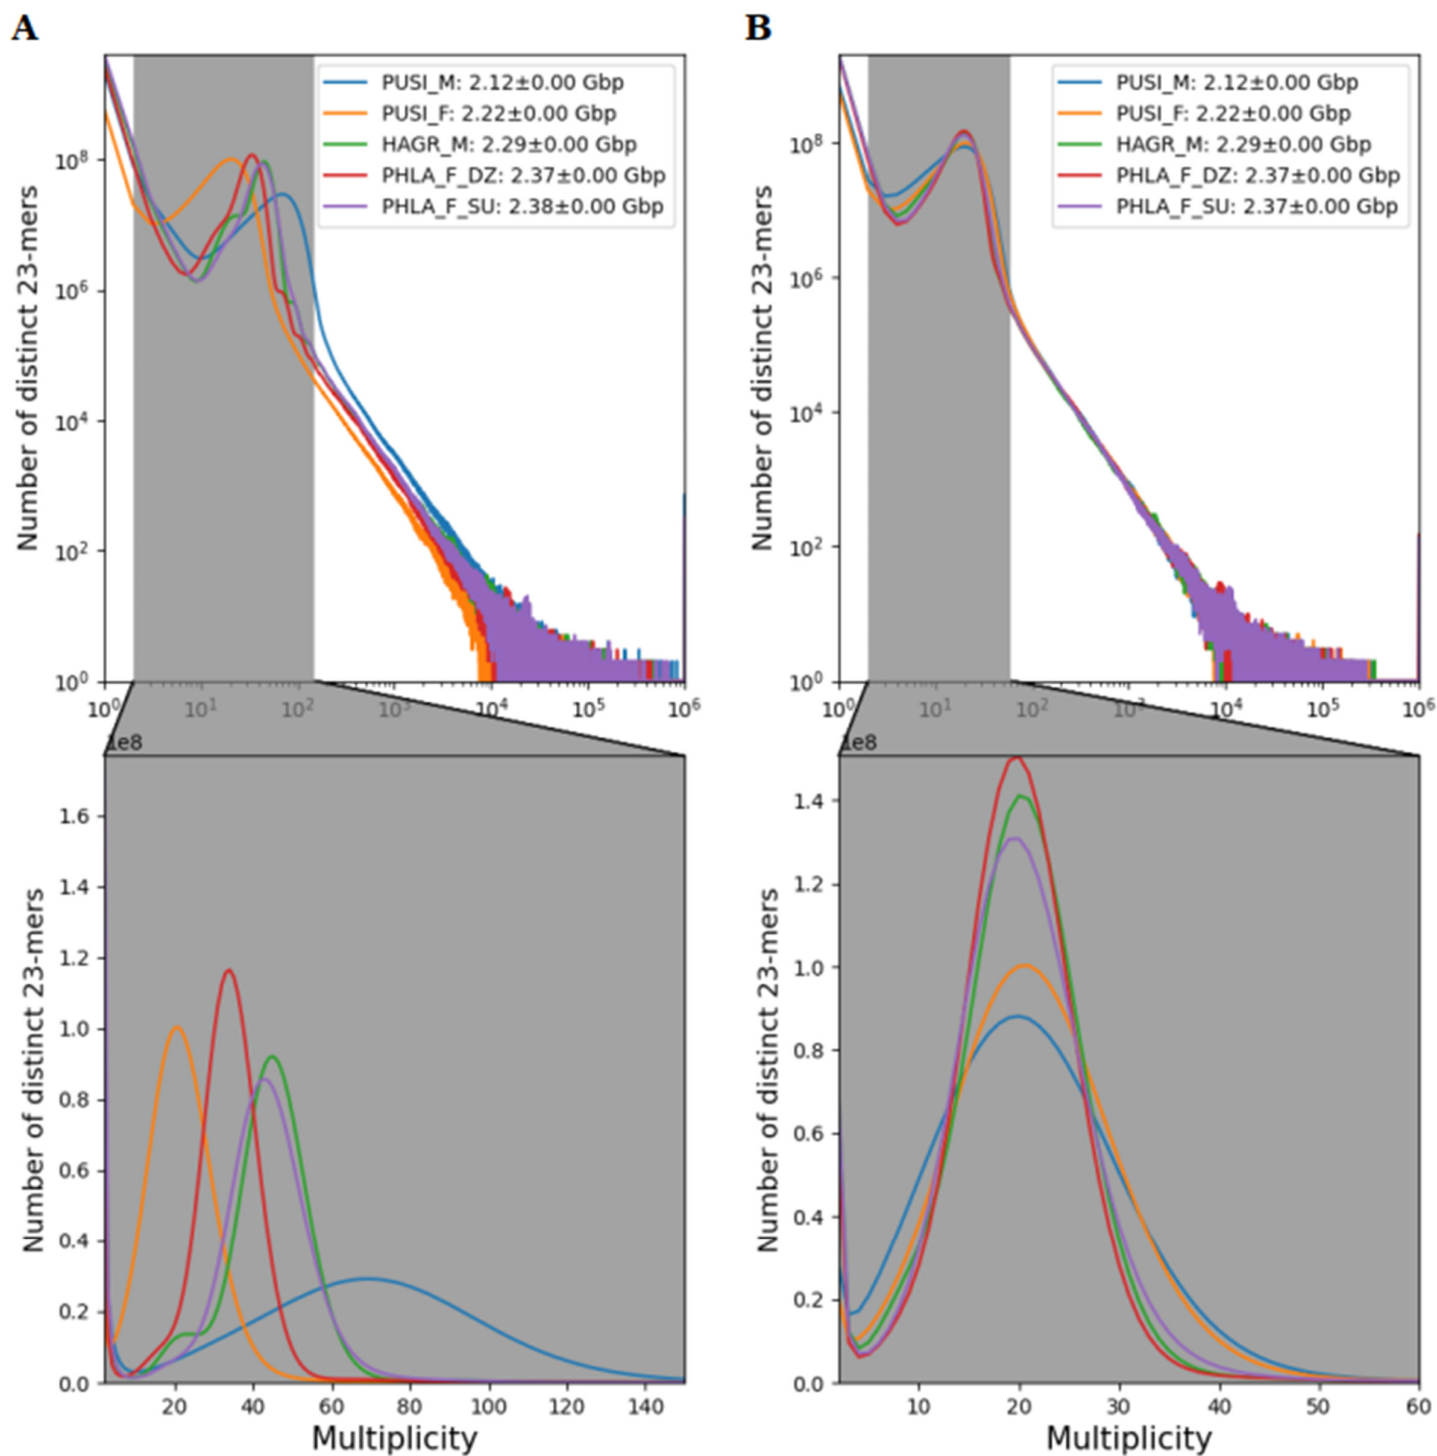

**Figure S1.** K-mer distribution of 23-mers for *Pusa sibirica*, *Halichoerus grypus*, and *Phoca largha* read after standard adapters trimming (A), and after further cut length, and downsampling (B). **PUSI\_M** - *Pusa sibirica* male sample; **PUSI\_F** - *Pusa sibirica* female sample; **HAGR\_M** - *Halichoerus grypus* DNAZoo sample; **PHLA\_F\_DZ** - *Phoca largha* DNAZoo sample; **PHLA\_F\_SU** - *Phoca largha* Seoul University sample.

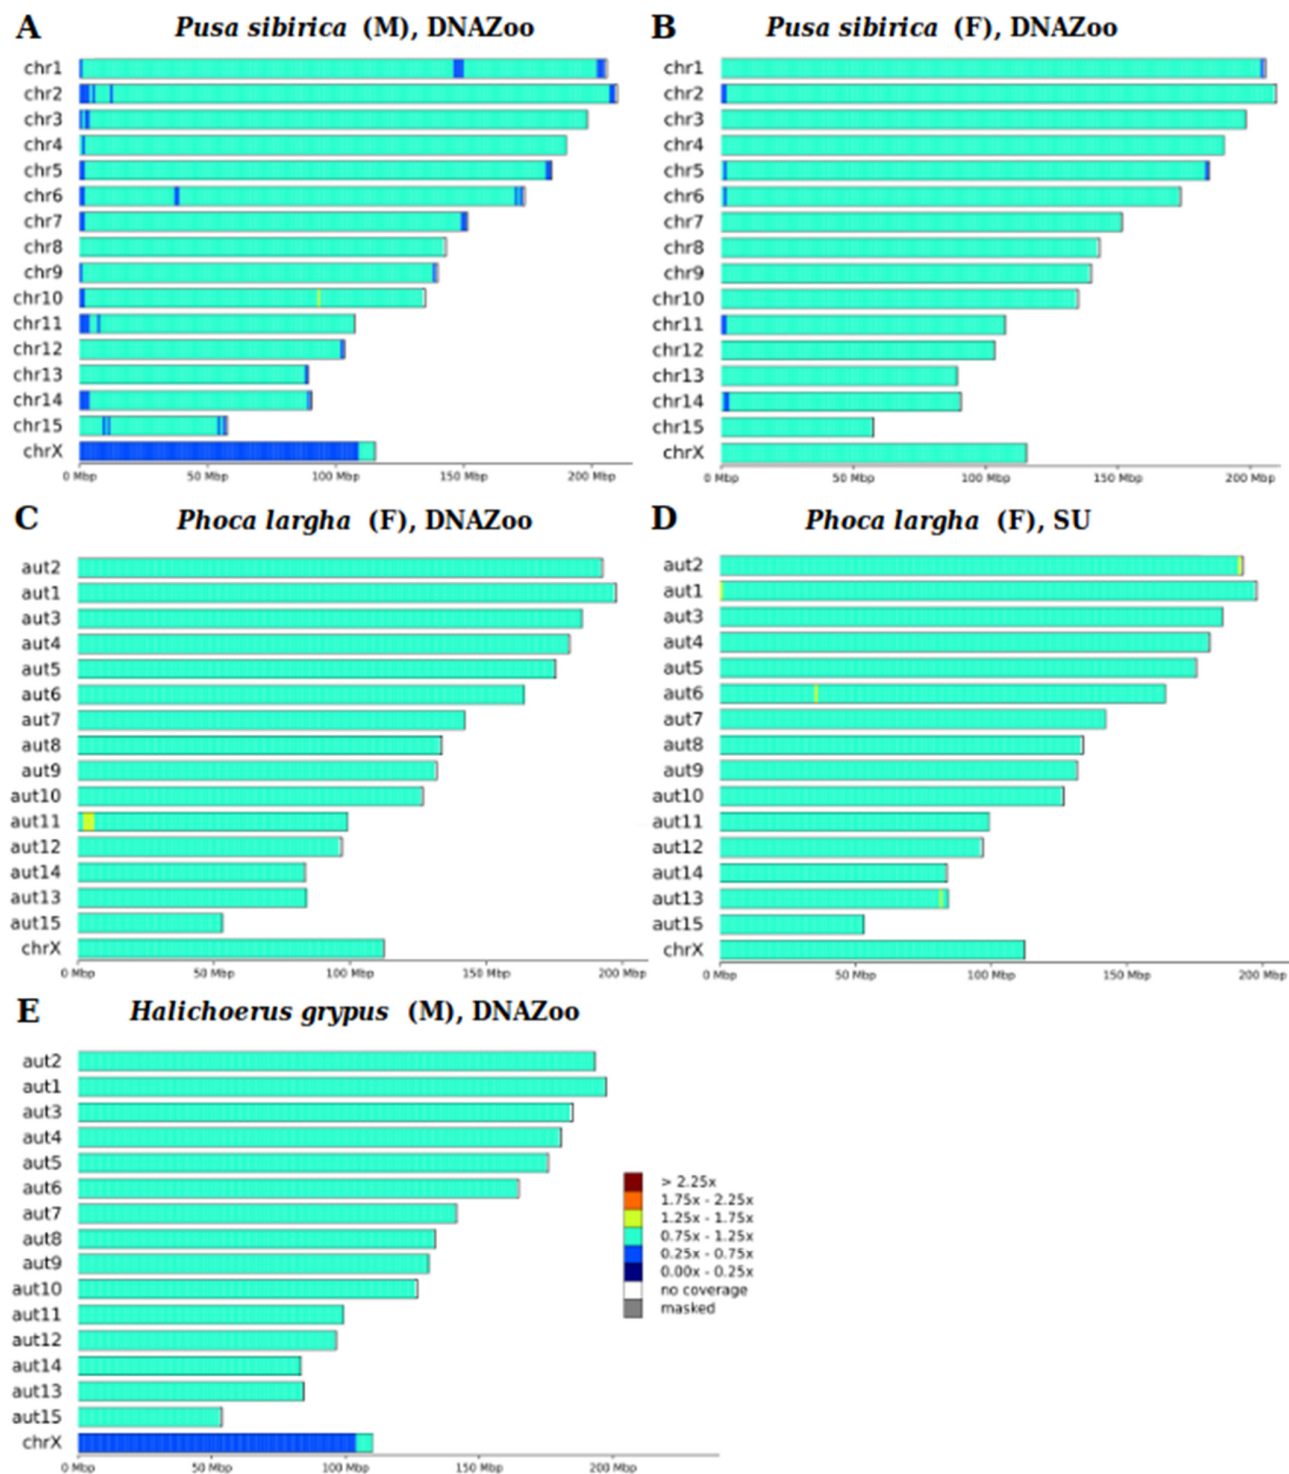

**Figure S2.** Coverage plots for (A) *Pusa sibirica*, female, DNAZoo, (B) *Pusa sibirica*, male, DNAZoo, (C) *Halichoerus grypus*, male, DNAZoo, (D) *Phoca largha*, female, DNAZoo, and (E) *Phoca largha*, female, Seoul University. Coverage was calculated in non-overlapping sliding windows of 1 Mbp and divided by whole genome median coverage.

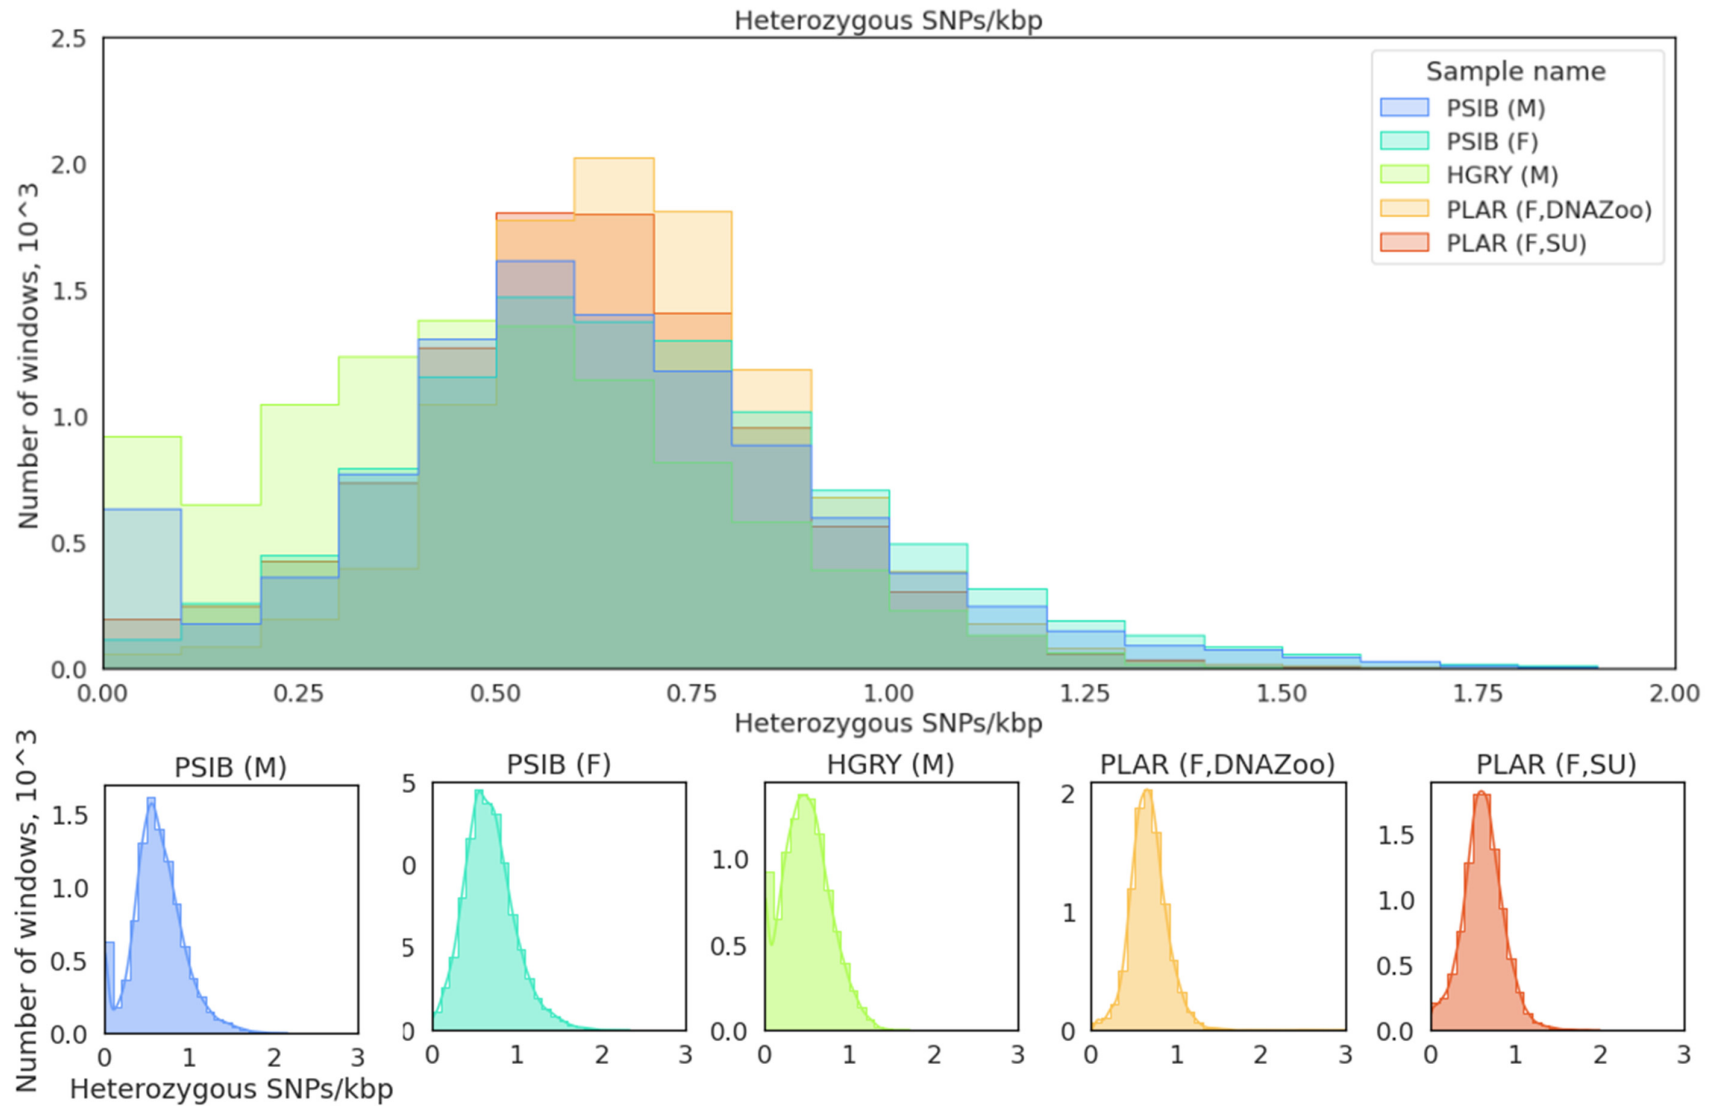

**Figure S3.** Genome-wide heterozygosity distribution for 2 samples of baikal seal (*Pusa sibirica*), 1 sample of grey seal (*Halichoerus grypus*) and 2 samples of spotted seal (*Phoca largha*). SNPs are counted in 1 Mbp non-overlapping sliding windows and scaled to heterozygous SNPs per kbp.

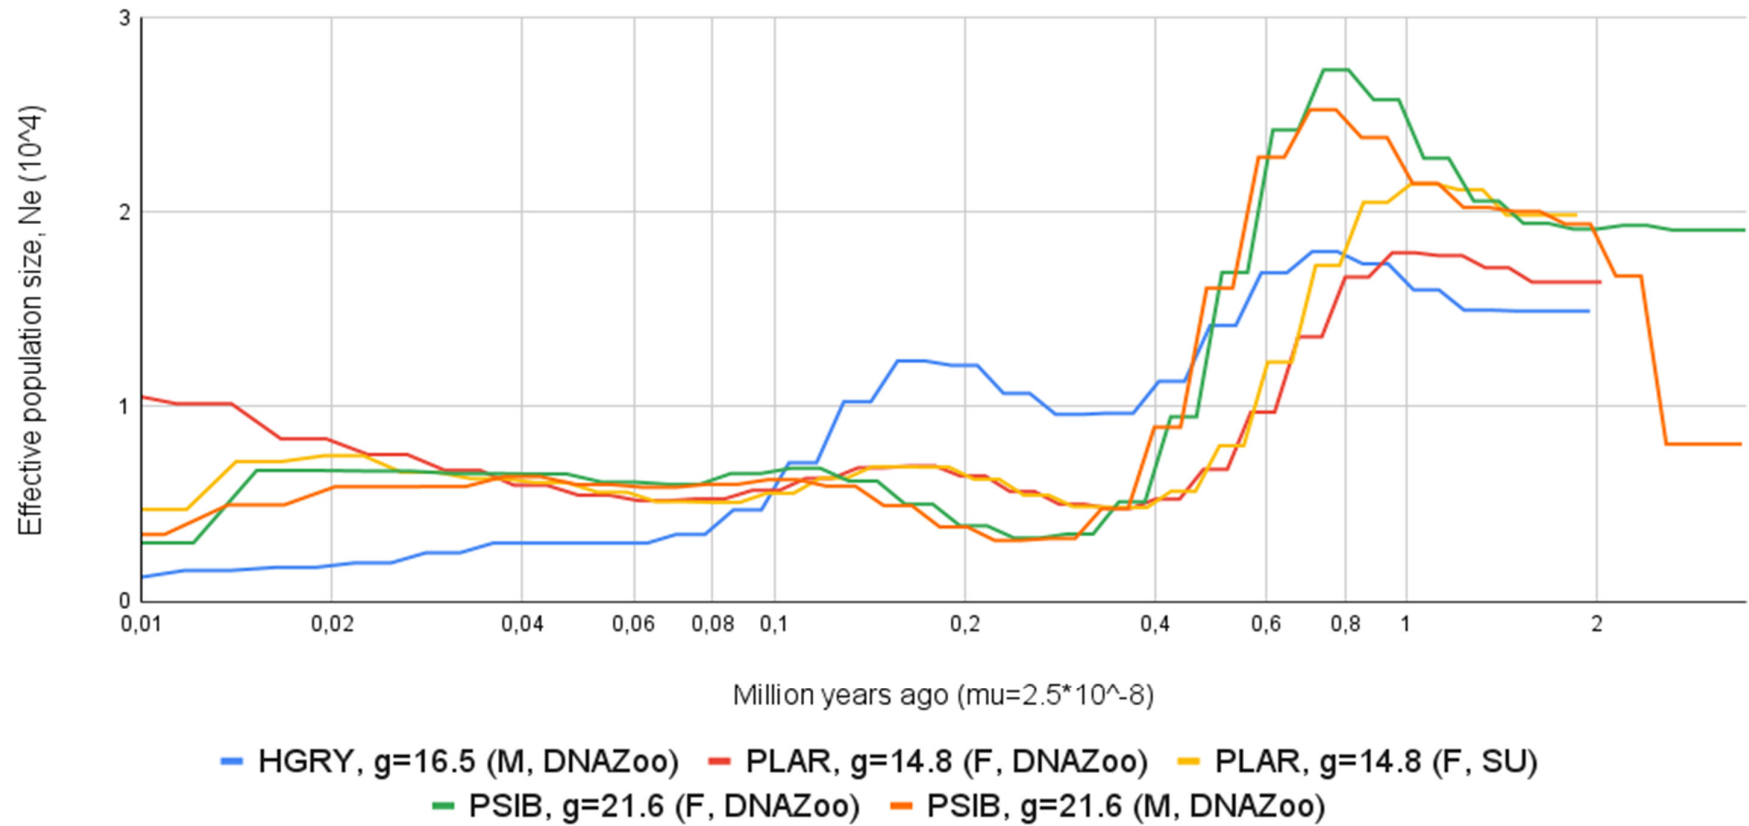

**Figure S4.** Demographic history reconstruction for all available samples of *Pusa sibirica*, *Halichoerus grypus*, and *Phoca largha* with mutation rate  $2.5 \times 10^{-8}$  excluding X chromosome.
